# Supplementary material for: Kinetics of Carboxylic Acid Enolization on Metal Oxides in Vapor Phase
Source: Research Square preprint supplement (doi:10.21203/rs.3.rs-8081029/v1), 2025-11-21
Supplement: Supplementary file 1 [file e7d16c39b34598917c31ecde.pdf]

# Kinetics of Carboxylic Acid Enolization on Metal Oxides in Vapor Phase

*Alexey V. Ignatchenko\*, Reem Ibrahim, Jordan R. Kostera, Jordan D. Walker, Jared J.*

*Jorolemon, Christian J. Leonardo*

Chemistry Department, St. John Fisher University, 3690 East Avenue, Rochester, NY 14618

## Supporting Information

### Table of Content

|                                                                                                                                                                                                                                                                                                        | page |
|--------------------------------------------------------------------------------------------------------------------------------------------------------------------------------------------------------------------------------------------------------------------------------------------------------|------|
| Section S1                                                                                                                                                                                                                                                                                             |      |
| Fig. S1. NMR spectrum of isobutyric acid solution in D <sub>2</sub> O .....                                                                                                                                                                                                                            | 2    |
| Fig. S2. Logarithmic plot of (1 - F) against time for an exchange experiment between isobutyric acid and D <sub>2</sub> O at 220 °C temperature at a constant molar fraction of D <sub>2</sub> O .....                                                                                                 | 3    |
| Table S1. Data for the calculation of R <sub>ex</sub> . .....                                                                                                                                                                                                                                          | 3    |
| Table S2. Data for the calculation of R <sub>ex</sub> for its dependance on D <sub>2</sub> O under pseudo-first-order conditions .....                                                                                                                                                                 | 4    |
| Fig. S3. Logarithmic plot of (1 - F) against time for an exchange experiment between isobutyric acid and D <sub>2</sub> O at 220 °C temperature with ZrO <sub>2</sub> catalyst for various molar fractions of D <sub>2</sub> O at approximately constant high partial pressure of isobutyric acid..... | 4    |
| Fig. S4. No dependence of R <sub>ex</sub> on the partial pressure of D <sub>2</sub> O under pseudo-first-order conditions .....                                                                                                                                                                        | 5    |
| Section S2                                                                                                                                                                                                                                                                                             |      |
| Weisz-Prater criterion for the absence of internal diffusion limitations .....                                                                                                                                                                                                                         | 6    |
| Table S3. Tabulation of parameters for the calculation of mass transfer limitation .....                                                                                                                                                                                                               | 7    |
| Fig. S4. Variation of the linear velocity to test for the absence of external diffusion limitation .....                                                                                                                                                                                               | 7    |

## Section S1.

3.7% Isobutyric Acid in D<sub>2</sub>O  
Benzene E.S.

November 10, 2022

conversion 10.8% for H/D exchange

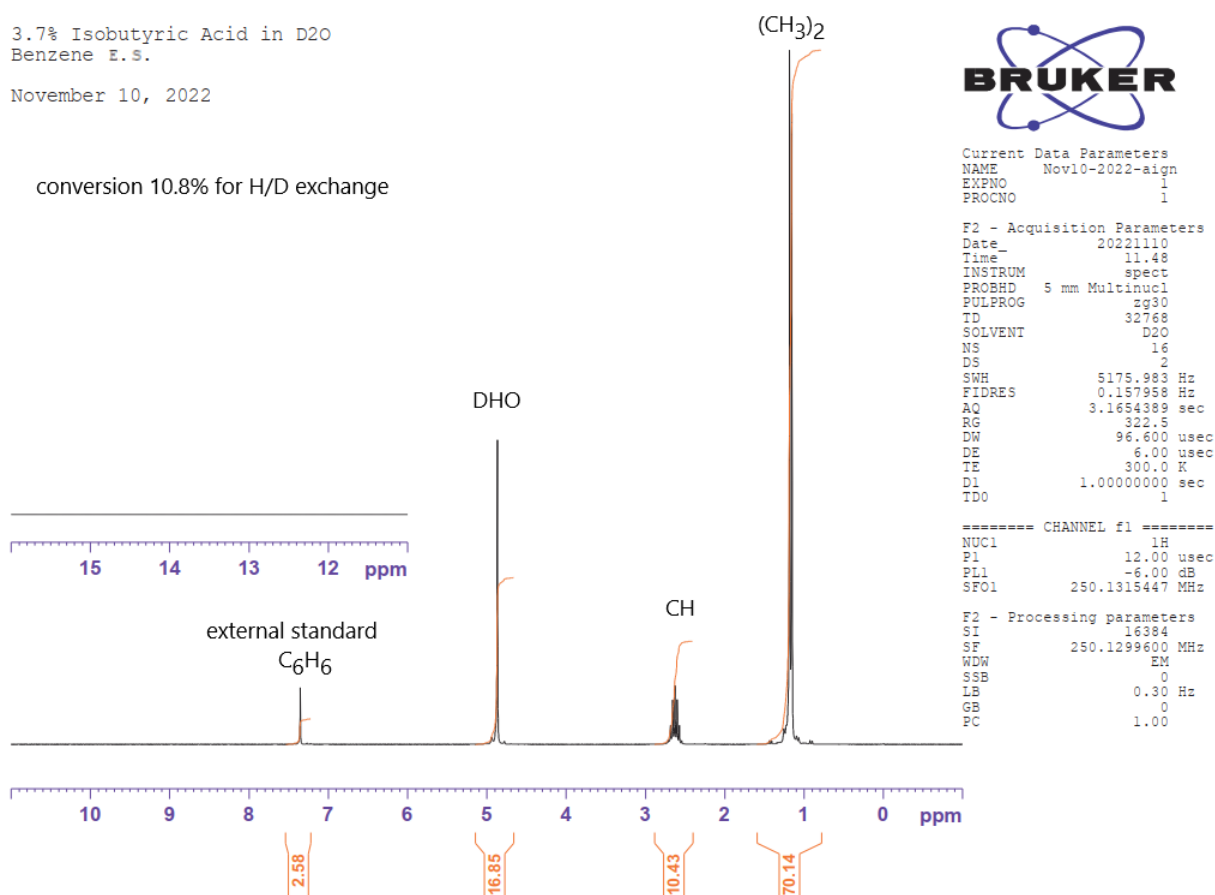

**Fig. S1.** Typical <sup>1</sup>H NMR spectrum of isobutyric acid solution in D<sub>2</sub>O.

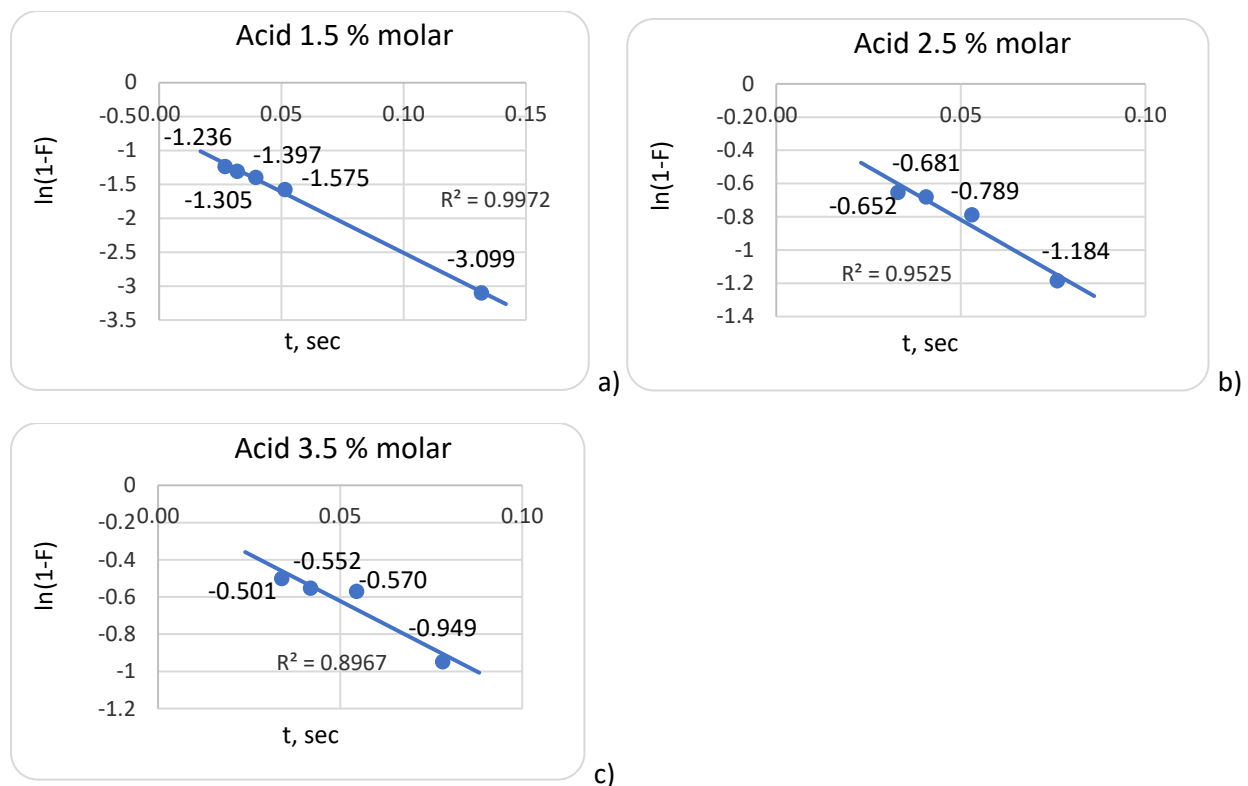

**Fig. S2.** Logarithmic plot of  $(1 - F)$  against time for an exchange experiment between isobutyric acid and  $D_2O$  at  $220^\circ C$  temperature with  $ZrO_2$  catalyst for various molar fractions of isobutyric acid, a) 1.5%,  $R_{ex} = 0.241 \pm 0.007$  b) 2.5%,  $R_{ex} = 0.283 \pm 0.043$  c) 3.5%,  $R_{ex} = 0.311 \pm 0.074$ .

**Table S1.** Data for the calculation of  $R_{ex}$  for its dependance on isobutyric acid under pseudo-first-order conditions

| $P_A$  | $P_X$ | Residence time | $\ln(1-F)$ | $R_{ex}$                        |
|--------|-------|----------------|------------|---------------------------------|
| atm    | atm   | sec            |            | $atm \cdot sec^{-1}$            |
| 0.0117 | 0.77  | 0.132          | -3.0994    | <b>0.241</b> $\pm$ <b>0.007</b> |
| 0.0137 | 0.90  | 0.051          | -1.57452   |                                 |
| 0.0140 | 0.92  | 0.039          | -1.39711   |                                 |
| 0.0142 | 0.93  | 0.032          | -1.30539   |                                 |
| 0.0143 | 0.94  | 0.027          | -1.23595   |                                 |
| 0.022  | 0.85  | 0.076          | -1.184     | <b>0.283</b> $\pm$ <b>0.043</b> |
| 0.023  | 0.89  | 0.053          | -0.78887   |                                 |
| 0.023  | 0.91  | 0.041          | -0.68112   |                                 |
| 0.024  | 0.92  | 0.033          | -0.65235   |                                 |
| 0.030  | 0.84  | 0.078          | -0.94894   | <b>0.311</b> $\pm$ <b>0.074</b> |
| 0.032  | 0.88  | 0.055          | -0.56988   |                                 |
| 0.033  | 0.90  | 0.042          | -0.55244   |                                 |
| 0.033  | 0.91  | 0.034          | -0.50086   |                                 |

**Table S2.** Data for the calculation of  $R_{ex}$  for its dependance on  $D_2O$  under pseudo-first-order conditions

| $P_A$ | $P_X$ | Residence time | $\ln(1-F)$ | $R_{ex}$              |                 |
|-------|-------|----------------|------------|-----------------------|-----------------|
| atm   | atm   | sec            |            | atm·sec <sup>-1</sup> |                 |
| 0.695 | 0.029 | 0.165          | -0.110     | <b>0.0051</b>         | <b>± 0.0024</b> |
| 0.747 | 0.031 | 0.133          | -0.100     |                       |                 |
| 0.781 | 0.033 | 0.112          | -0.090     |                       |                 |
| 0.806 | 0.034 | 0.096          | -0.096     |                       |                 |
| 0.840 | 0.035 | 0.075          | -0.096     |                       |                 |
| 0.701 | 0.022 | 0.166          | -0.097     | <b>0.0072</b>         | <b>± 0.0028</b> |
| 0.753 | 0.023 | 0.134          | -0.092     |                       |                 |
| 0.788 | 0.024 | 0.112          | -0.089     |                       |                 |
| 0.814 | 0.025 | 0.097          | -0.071     |                       |                 |
| 0.620 | 0.013 | 0.220          | -0.083     |                       |                 |
| 0.707 | 0.014 | 0.167          | -0.078     | <b>0.0011</b>         | <b>± 0.0002</b> |
| 0.795 | 0.016 | 0.113          | -0.075     |                       |                 |
| 0.821 | 0.017 | 0.097          | -0.072     |                       |                 |
| 0.841 | 0.017 | 0.085          | -0.074     |                       |                 |
| 0.760 | 0.016 | 0.135          | -0.074     |                       |                 |

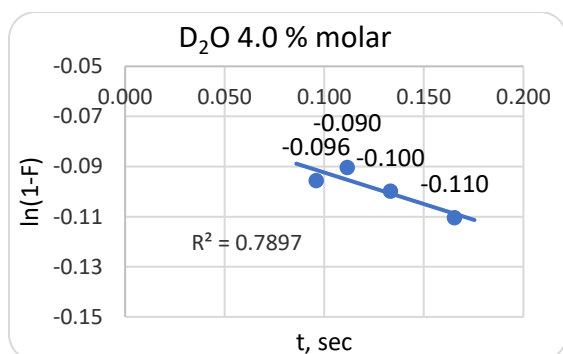

a)

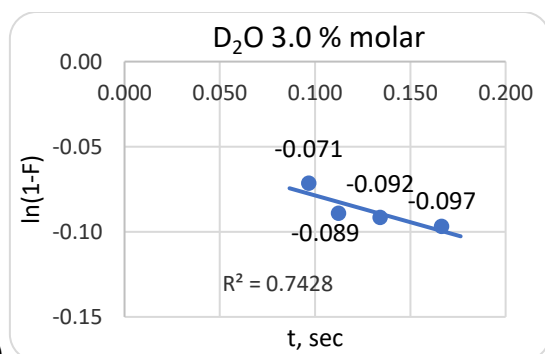

b)

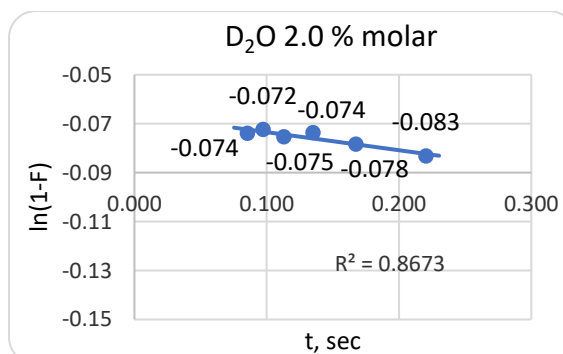

c)

**Fig. S3.** Logarithmic plot of  $(1 - F)$  against time for an exchange experiment between isobutyric acid and  $D_2O$  at 220 °C temperature with  $ZrO_2$  catalyst for various molar fractions of  $D_2O$  a) 4.0% b) 3.0% c) 2.0%.

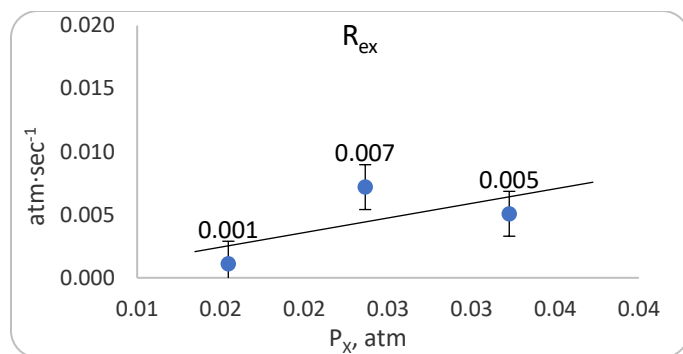

**Fig. S4.**  $R_{ex}$  (values listed in Table S2) shows scattering (no clear dependence on the partial pressure of  $D_2O$ ) under pseudo-first-order conditions at approximately constant high partial pressure of isobutyric acid.

## Section S2. Tests for the absence of diffusion limitations

**Weisz-Prater criterion for the absence of internal diffusion limitations.** Measurements of reaction rates were evaluated for the absence of external and internal mass transfer limitations. To evaluate possible internal mass transfer limitations, the Weisz-Prater criterion,  $C_{wp}$ , was calculated according to the next formula:

$$C_{wp} = \frac{r_{obs} R_p^2}{C_s D_e} \quad (S1)$$

Where:

- $C_{wp}$  = Weisz-Prater criterion (dimensionless).
- $r_{obs}$  = observed reaction rate per unit volume of catalyst ( $\text{mol}/\text{m}^3 \cdot \text{s}$ ).
- $R_p$  = radius of the catalyst particle (m).
- $C_s$  = concentration of reactant at the external surface of the particle ( $\text{mol}/\text{m}^3$ ).
- $D_e$  = effective diffusivity of the reactant in the porous catalyst ( $\text{m}^2/\text{s}$ ).

The effective diffusivity ( $D_e$ ) was calculated from Knudsen diffusivity ( $D_{AB}$ ) by the next equation:

$$D_e = \frac{D_{AB} \varphi_p \sigma_c}{\tau} \quad (S2)$$

Where  $\varphi_p$  is pellet porosity,  $\sigma_c$  is constriction factor, and  $\tau$  is tortuosity. Knudsen diffusivity ( $D_{AB}$ ) was calculated by the next equation:

$$D_{AB} = \frac{d_{pore}}{3} \sqrt{\frac{8RT}{\pi M}} \quad (S3)$$

where  $d_{pore}$  is the mean pore diameter,  $R$  is the ideal gas constant, and  $M$  is the molecule's molar mass.

**Table S3.** Tabulation of parameters for the calculation of mass transfer limitation for isobutyric acid H/D exchange with ZK catalyst at 200 °C temperature, 0.02 atm acid pressure.

| Parameter  | Value      | Dimensionality                                       |
|------------|------------|------------------------------------------------------|
| $r_{obs}$  | 11.366     | $\text{mol} \cdot \text{m}^{-3} \cdot \text{s}^{-1}$ |
| $R_p$      | 0.00025    | m                                                    |
| $C_s$      | 0.8929     | $\text{mol} \cdot \text{m}^{-3}$                     |
| $D_e$      | 1.5646E-05 | $\text{m}^2 \cdot \text{s}^{-1}$                     |
| $D_{AB}$   | 5.6895E-08 | $\text{m}^2 \cdot \text{s}^{-1}$                     |
| $\phi_p$   | 1.1        | $\text{cm}^3 \cdot \text{g}^{-1}$                    |
| $\sigma_c$ | 1000       | $\text{kg} \cdot \text{m}^{-3}$                      |
| $\tau$     | 4          | dimensionless                                        |
| $d_{pore}$ | 1.6E-08    | m                                                    |
| R          | 8.31446262 | $\text{J} \cdot \text{mol}^{-1} \cdot \text{K}^{-1}$ |
| T          | 473        | K                                                    |
| M          | 88         | amu                                                  |
| $C_{wp}$   | 0.051      | dimensionless                                        |

The highest value of  $C_{wp} = 0.051$  was found for ZK catalyst. Values for other catalysts, ZR, Ti, TK, were even smaller, 0.005, 0.037, 0.018, respectively. Since Weisz-Prater criterion,  $C_{wp} \ll 1$ , the measured reaction rate describes the catalytic reaction without being affected by internal mass transfer limitation phenomena.

**Variation of the linear velocity at a constant residence time to test for the absence of external diffusion limitations.** To check for any potential external diffusion limitations, the linear velocity of the gas feed was varied while keeping space time velocity (and the residence time) constant by adjusting the catalyst amount. No significant changes in the reaction rate were observed above velocity 10 m/sec, indicating that external mass transfer did not control the reaction rate (Fig. S4).

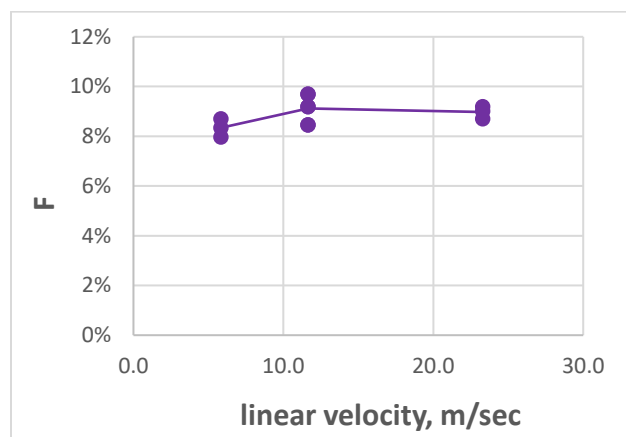

**Fig. S5.** Fraction of H/D exchange for isobutyric acid solution in D<sub>2</sub>O with Ti catalyst at the temperature 200 °C measured in triplicate at the constant residence time, 0.0030 sec, at various linear velocities of the gas.

It was concluded that the system operated under kinetic control, with the observed reaction rates being controlled by the catalytic surface reactions rather than mass transport phenomena.
